# Supplementary material for: Alternating-current driven quantum-dot light-emitting diodes with high brightness
Source: Royal Society of Chemistry journal article supplement (doi:10.1039/c8nr10461a), 2019-01-01
Supplement: c8nr10461a1.pdf [file c8nr10461a1.pdf]

## Supporting Information

### Alternating-Current Driven Quantum-Dot Light-Emitting-Diodes with High Brightness

Fengtian Xia, Shuming Chen\*,

Department of Electrical and Electronic Engineering, Southern University of Science  
and Technology, Shenzhen, 518055, P. R. China

chen.sm@sustc.edu.cn

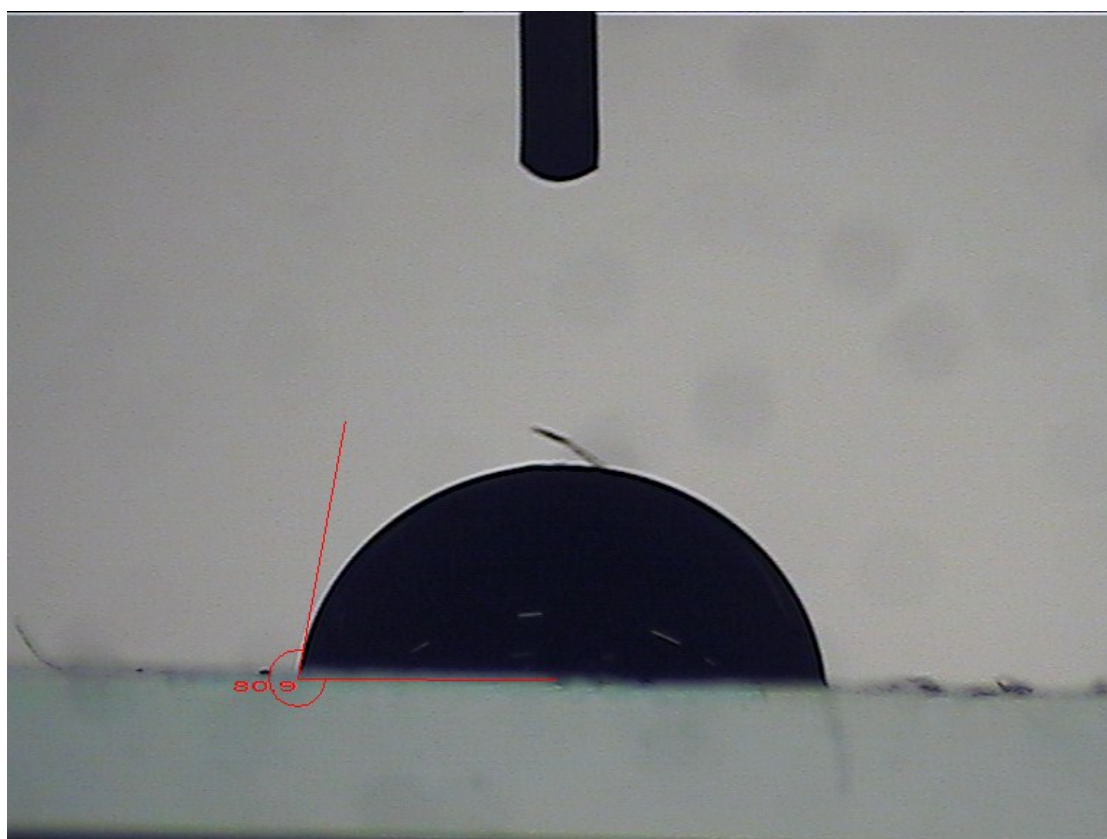

**Figure S1.** Contact angle of PEDOT:PSS deposited on P(VDF-TrFE-CFE).

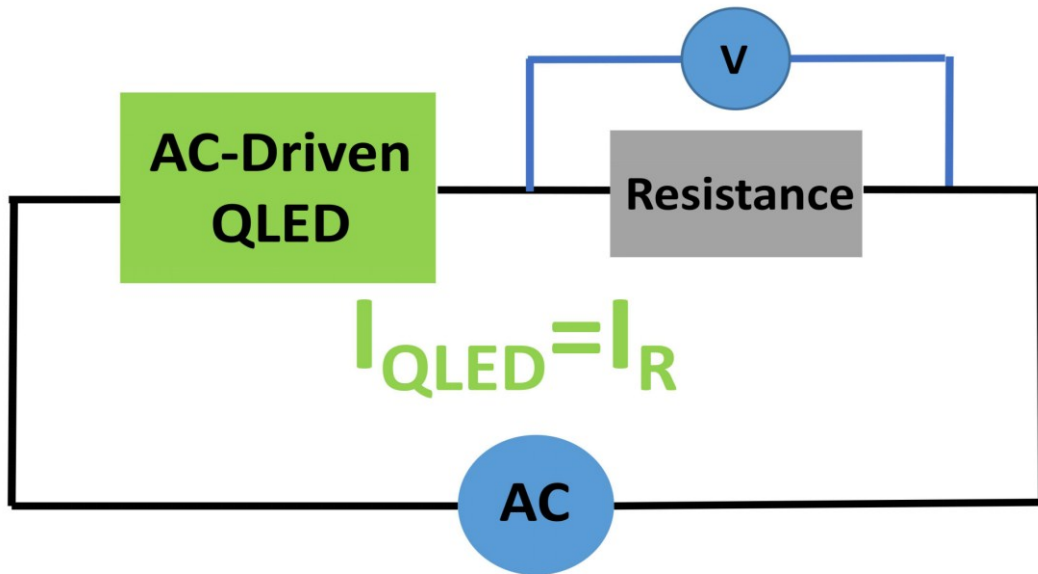

**Figure S2.** Method of measuring the current of AC-driven QLED.

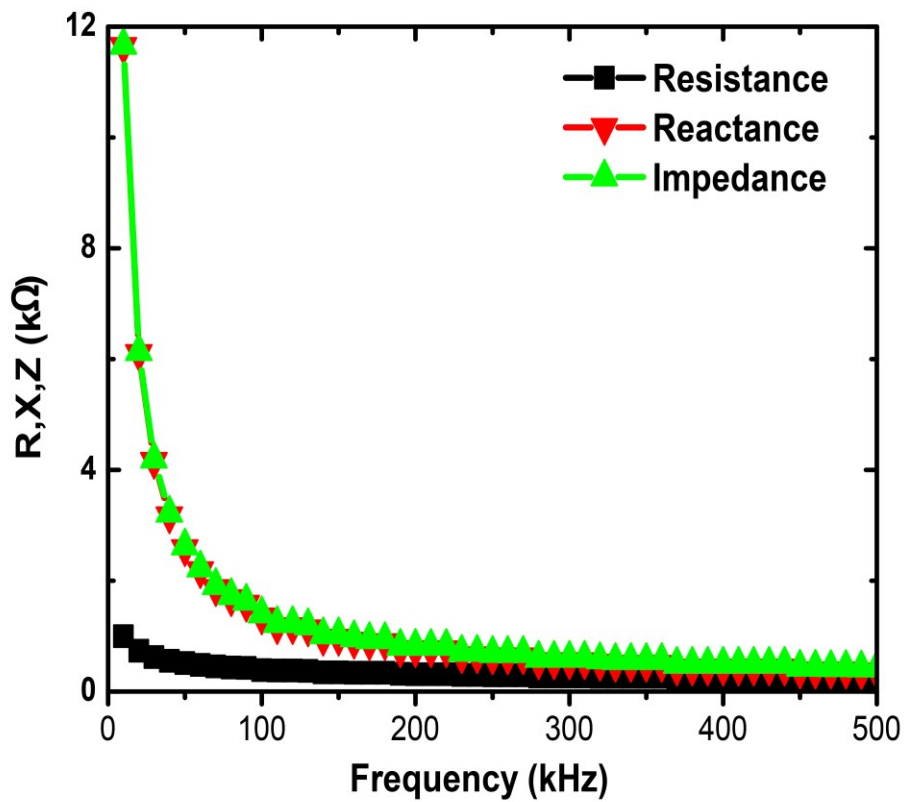

**Figure S3.** Resistance, reactance and impedance as functions of frequency.

**Table S1.** The key performances of the representative AC-driven devices in literature.

| Device Structure                                                                                                     | Device Type | Insulation Type   | Color         | Max L<br>(cd m <sup>-2</sup> ) | Max CE<br>(cd A <sup>-1</sup> ) | Ref. |
|----------------------------------------------------------------------------------------------------------------------|-------------|-------------------|---------------|--------------------------------|---------------------------------|------|
| ITO/SiO <sub>2</sub> /Alq <sub>3</sub> /SiO <sub>2</sub> /Al                                                         | AC-OLED     | Double-insulation | Blue          | -                              | -                               | 1    |
| ITO/PVP/PVK/BND/MEH-PPV/ITO/PVK/BND/MEH-PPV/PVP/Al                                                                   | AC-OLED     | Double-insulation | Orange-Red    | 261                            | -                               | 2    |
| ITO/SiO <sub>2</sub> /CNT:PS-b-PPP:F8BT/Au                                                                           | AC-OLED     | Single-insulation | Yellow        | 350                            | -                               | 3    |
| ITO/HfO <sub>2</sub> /MeO-TPD:F6TCNNQ/Spiro-TAD/TCTA:Ir(ppy) <sub>3</sub> /Bphen/Bphen:Cs/HfO <sub>2</sub> /Al       | AC-OLED     | Double-insulation | Green         | 500                            | -                               | 4    |
| ITO/P(VDF-TrFE)/PVK:Ir(ppy) <sub>3</sub> /Ca/Al                                                                      | AC-OLED     | Single-insulation | Green         | 550                            | -                               | 5    |
| ITO/SiO <sub>2</sub> /MeO-TPD:F4TCNQ/NPB/Ir(MDQ) <sub>2</sub> (acac)/BPhen/BPhen:Cs/SiO <sub>2</sub> /Al             | AC-OLED     | Double-insulation | Orange-Red    | 1000                           | -                               | 6    |
| ITO/HfO <sub>2</sub> /MeO-TPD:F4TCNQ/NPB/Ir(MDQ) <sub>2</sub> (acac)/BPhen/BPhen:Cs/HfO <sub>2</sub> /Al             | AC-OLED     | Double-insulation | Orange-Red    | 1500                           | -                               | 7    |
| ITO/SiO <sub>2</sub> /NWNTs:PS-b-P4VP/B-G-R Layer/Ag                                                                 | AC-OLED     | Single-insulation | Red           | 5000                           | -                               | 8    |
|                                                                                                                      |             |                   | Green         | 6000                           |                                 |      |
|                                                                                                                      |             |                   | Blue          | 2300                           |                                 |      |
| ITO/SWNTs:P(VDF-TrFE-CFE)/P3HT:F4TCNQ/PVK:OXD-7:Ir(ppy) <sub>3</sub> /TmPyPB:Li <sub>2</sub> CO <sub>3</sub> /LiF/Al | AC-OLED     | Single-insulation | Green         | 7210                           | 33.8                            | 9    |
| ITO/P(VDF-TrFE-CFE)/Poly-TPD:F4TCNQ/PVK:OXD-7:Ir(ppy) <sub>3</sub> /TmPyPB/LiF/Al                                    | AC-OLED     | Single-insulation | Green         | 13500                          | 72.5                            | 10   |
| ITO/P(VDF-TrFE-CFE)/P3HT:F4TCNQ/PVK:OXD-7:Phosphors/TmPyPB/LiF/Al                                                    | AC-OLED     | Single-insulation | Orange-Red    | 1600                           | 8.8                             | 11   |
|                                                                                                                      |             |                   | Green         | 13800                          | 76.4                            |      |
|                                                                                                                      |             |                   | Blue          | 3000                           | 15.8                            |      |
| ITO/P(VDF-TrFE-CFE)/P3HT:F4TCNQ/PVK:OXD-7:Ir(ppy) <sub>3</sub> /TmPyPB/LiF/Al                                        | AC-OLED     | Single-insulation | Green         | 20500                          | 110.7                           | 12   |
| ITO/Al <sub>2</sub> O <sub>3</sub> /ZnS/ZnSe/ZnS:Mn/ZnS/ Al <sub>2</sub> O <sub>3</sub> /ITO                         | AC-TFEL     | Double-insulation | Orange        | -                              | -                               | 13   |
| ITO/SiO <sub>2</sub> /F8BT:QDs/Au                                                                                    | AC-Q/OLED   | Single-insulation | Green         | 650                            | -                               | 14   |
| ITO/SiO <sub>2</sub> /QDs:PIB/SiO <sub>2</sub> /Al                                                                   | AC-QLED     | Double-insulation | R/G/B         | -                              | -                               | 15   |
| ITO/AL <sub>2</sub> O <sub>3</sub> /QDs:PIB/ZnO/ZnS:Cu/Conductive tape                                               | AC-QLED     | Single-insulation | R/G/B         | -                              | -                               | 16   |
| Al/Si/Si QD/Si/SiO <sub>2</sub> /ITO                                                                                 | AC-QLED     | Double-insulation | Near Infrared | -                              | -                               | 17   |
| ITO/QDs:MEH-PPV/Phosphor/Ag                                                                                          | AC-QLED     | Double-insulation | Orange        | 18.6                           | -                               | 18   |
|                                                                                                                      |             |                   | Green         | 82.3                           |                                 |      |
|                                                                                                                      |             |                   | Blue          | 49.2                           |                                 |      |
| ITO/P(VDF-TrFE-CFE)/MoO <sub>3</sub> /TFB/QDs/ZnMgO/Al                                                               | AC-QLED     | Single-insulation | Green         | 65760                          | 4.4                             | ours |

## References

- [1] X. L. Xu, X. H. Chen, Y. B. Hou, Z. Xu, X. H. Yang, S. G. Yin, Z. J. Wang, X. R. Xu, S. P. Lau, B. K. Tay, Blue electroluminescence from tris-(8-hydroxyquinoline)

- aluminum thin film, *Chem. Phys. Lett.*, 2000, **325**, 420-424.
- [2] S. B. Lee, K. Fujita, T. Tsutsui, Emission Mechanism of Double-Insulating Organic Electroluminescence Device Driven at AC Voltage, *Jpn. J. Appl. Phys.*, 2005, **44**, 6607-6611.
- [3] J. Sung, Y. S. Choi, S. J. Kang, S. H. Cho, T. Lee, C. Park, AC field-induced polymer electroluminescence with single wall carbon nanotubes, *Nano Lett.*, 2011, **11**, 966-972.
- [4] M. Fröbel, A. Perumal, T. Schwab, M. C. Gather, B. Lüssem, K. Leo, Enhancing the efficiency of alternating current driven organic light-emitting devices by optimizing the operation frequency, *Org. Electron*, 2013, **14**, 809-813.
- [5] Y. Xia, Y. Chen, G. M. Smith, Y. Li, W. X. Huang, D. L. Carroll, Carroll, D. L. Effects of electrode modification using calcium on the performance of alternating current field-induced polymer electroluminescent devices, *Appl. Phys. Lett.*, 2013, **102**, 253302.
- [6] A. Perumal, M. Fröbel, S. Gorantla, T. Gemming, B. Lüssem, J. Eckert, K. Leo, Novel Approach for Alternating Current (AC)-Driven Organic Light-Emitting Devices, *Adv. Funct. Mater.*, 2012, **22**, 210-217.
- [7] A. Perumal, B. Lüsse, K. Leo, High brightness alternating current electroluminescence with organic light emitting material, *Appl. Phys. Lett.*, 2012, **100**, 68.
- [8] S. H. Cho, S. S. Jo, I. Hwang, J. Sung, J. Seo, S. Jung, I. Bae, J. R. Choi, H. Cho, T. Lee, J. K. Lee, T. Lee, C. Park, Extremely Bright Full Color Alternating Current Electroluminescence of Solution-Blended Fluorescent Polymers with Self-Assembled Block Copolymer Micelles, *ACS Nano*, 2013, **7**, 10809-10817.
- [9] Y. Chen, Y. Xia, G. M. Smith, C. A. Hewitt, Q. Fu, Y. Liu, H. Sun, D. Ma, Y. Gu, C. Yang, Y. Mei, D. L. Carroll, High-color-quality white emission in AC-driven field-induced polymer electroluminescent devices, *Org. Electron*, 2014, **15**, 182-188.
- [10] Y. Chen, Y. Xia, G. M. Smith, D. L. Carroll, Electroluminescent devices: frequency-dependent, alternating current-driven, field-induced polymer electroluminescent devices with high power efficiency, *Adv. Mater.*, 2014, **26**, 8133-

8140.

[11] Y. Chen, Y. Xia, H. Sun, G. M. Smith, D. Yang, D. Ma, D. L. Carroll, Thin Films: Solution-Processed Highly Efficient Alternating Current-Driven Field-Induced Polymer Electroluminescent Devices Employing High-k Relaxor Ferroelectric Polymer Dielectric, *Adv. Funct. Mater.*, 2014, **24**, 1501-1508.

[12] Y. Chen, Y. Xia, G. M. Smith, H. Sun, D. Yang, D. Ma, Y. Li, W. Huang, D. L. Carroll, *Adv. Funct. Mater.* 2014, **24**, 2677.

[13] V. Wood, J. Halpert, M. J. Panzer, M. Bawendi, Alternating Current Driven Electroluminescence from ZnSe/ZnS:Mn/ZnS Nanocrystals, *Nano Lett.*, 2009, **9**, 2367-2371.

[14] S. H. Cho, J. Sung, I. Hwang, R. H. Kim, Y. S. Choi, S. S. Jo, T. W. Lee, C. Park, High Performance AC Electroluminescence from Colloidal Quantum Dot Hybrids, *Adv. Mater.*, 2012, **24**, 4540-4546.

[15] V. Wood, M. J. Panzer, D. Bozyigit, Y. Shirasaki, I. Rousseau, S. Geyer, M. Bawendi, V. Bulovic, Electroluminescence from Nanoscale Materials via Field-Driven Ionization, *Nano Lett.*, 2011, **11**, 2927-2932.

[16] V. Wood, M. J. Panzer, J. Chen, M. S. Bradley, J. Halpert, M. Bawendi, V. Bulovic, Inkjet-printed Quantum Dot-Polymer Composites for Full-color AC-driven Displays, *Adv. Mater.*, 2010, **21**, 2151-2155.

[17] W. W. Mu, P. Zhang, J. Xu, S. H. Sun, J. Xu, W. Li, K. J. Chen, Direct-Current and Alternating-Current Driving Si Quantum Dots-Based Light Emitting Device, *IEEE J. Quantum Elect.*, 2014, **20**, 206-211.

[18] R. M. Taylor, K. H. Church, M. I. Sluch, Red light emission from hybrid organic/inorganic quantum dot AC light emitting displays, *Displays*, 2007, **28**, 92-96.
